# Supplementary material for: High-performance solar-blind imaging photodetectors based on micrometer-thick β-Ga 2 O 3 films grown by thermal oxidation of gallium
Source: Royal Society of Chemistry journal article supplement (doi:10.1039/d4tc04116j), 2024-11-12
Supplement: d4tc04116j1.pdf [file d4tc04116j1.pdf]

[Supporting Information]

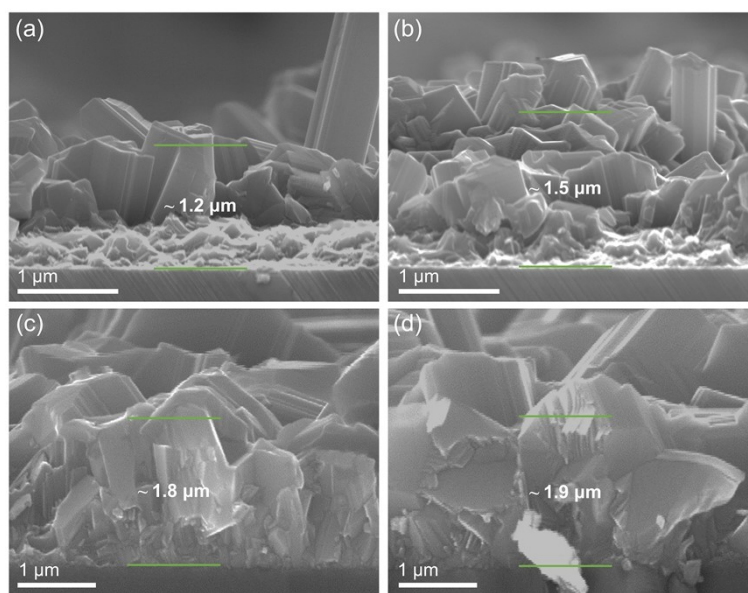

**Figure S1.** Cross-sectional SEM images of Ga<sub>2</sub>O<sub>3</sub> films prepared at different heating rates during thermal oxidation. (a) 20 °C/min, (b) 10 °C/min, (c) 5 °C/min, and (d) 2 °C/min.

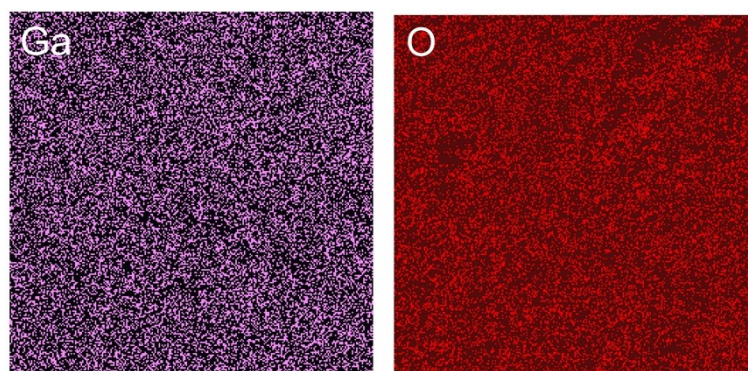

**Figure S2.** SEM-EDX mapping of Ga<sub>2</sub>O<sub>3</sub> film at a scale of 100 μm × 100 μm.
